# Supplementary material for: A simple molecular design towards the conversion of a MCL backbone to a multifunctional emitter exhibiting polymorphism, AIE, TADF and MCL
Source: PubMed Central journal article supplement — Heliyon. 2022 Oct 25;8(10):e11221. doi: 10.1016/j.heliyon.2022.e11221 (PMC9634020; doi:10.1016/j.heliyon.2022.e11221), 2022-10-25

# checkCIF/PLATON report

Structure factors have been supplied for datablock(s) aaa

THIS REPORT IS FOR GUIDANCE ONLY. IF USED AS PART OF A REVIEW PROCEDURE FOR PUBLICATION, IT SHOULD NOT REPLACE THE EXPERTISE OF AN EXPERIENCED CRYSTALLOGRAPHIC REFEREE.

No syntax errors found.      CIF dictionary      Interpreting this report

## Datablock: aaa

---

Bond precision:    C-C = 0.0117 Å                      Wavelength=0.71073

Cell:              a=13.267(2)              b=16.259(3)              c=22.397(3)  
                    alpha=74.897(6)          beta=85.589(7)          gamma=84.927(7)

Temperature:      296 K

|                        | Calculated                              | Reported                 |
|------------------------|-----------------------------------------|--------------------------|
| Volume                 | 4638.8(13)                              | 4639.0(13)               |
| Space group            | P -1                                    | P -1                     |
| Hall group             | -P 1                                    | -P 1                     |
| Moiety formula         | 2(C54 H36 N4 O), C H Cl3<br>[+ solvent] | C H Cl3, 2(C54 H36 N4 O) |
| Sum formula            | C109 H73 Cl3 N8 O2 [+<br>solvent]       | C109 H73 Cl3 N8 O2       |
| Mr                     | 1633.10                                 | 1633.10                  |
| Dx, g cm <sup>-3</sup> | 1.169                                   | 1.169                    |
| Z                      | 2                                       | 2                        |
| Mu (mm <sup>-1</sup> ) | 0.153                                   | 0.153                    |
| F000                   | 1700.0                                  | 1700.0                   |
| F000'                  | 1701.48                                 |                          |
| h,k,lmax               | 15,19,26                                | 15,19,26                 |
| Nref                   | 16350                                   | 16104                    |
| Tmin,Tmax              | 0.970,0.977                             | 0.507,0.746              |
| Tmin'                  | 0.970                                   |                          |

Correction method= # Reported T Limits: Tmin=0.507 Tmax=0.746  
AbsCorr = MULTI-SCAN

Data completeness= 0.985                      Theta(max)= 25.000

R(reflections)= 0.1047( 4523)              wR2(reflections)= 0.2671( 16104)

S = 0.920                                      Npar= 1091

---

The following ALERTS were generated. Each ALERT has the format

**test-name\_ALERT\_alert-type\_alert-level.**

Click on the hyperlinks for more details of the test.

---

 **Alert level A**

PLAT026\_ALERT\_3\_A Ratio Observed / Unique Reflections (too) Low .. 28% Check

---

 **Alert level B**

PLAT340\_ALERT\_3\_B Low Bond Precision on C-C Bonds ..... 0.0117 Ang.

---

 **Alert level C**

RINTA01\_ALERT\_3\_C The value of Rint is greater than 0.12

Rint given 0.122

PLAT020\_ALERT\_3\_C The Value of Rint is Greater Than 0.12 ..... 0.122 Report

PLAT084\_ALERT\_3\_C High wR2 Value (i.e. > 0.25) ..... 0.27 Report

PLAT230\_ALERT\_2\_C Hirshfeld Test Diff for N3 --C103 . 5.4 s.u.

PLAT230\_ALERT\_2\_C Hirshfeld Test Diff for C55 --C56 . 5.9 s.u.

PLAT230\_ALERT\_2\_C Hirshfeld Test Diff for C81 --C82 . 6.2 s.u.

PLAT234\_ALERT\_4\_C Large Hirshfeld Difference N7 --C40 . 0.17 Ang.

PLAT234\_ALERT\_4\_C Large Hirshfeld Difference C4 --C12 . 0.16 Ang.

PLAT234\_ALERT\_4\_C Large Hirshfeld Difference C14 --C15 . 0.17 Ang.

PLAT234\_ALERT\_4\_C Large Hirshfeld Difference C15 --C18 . 0.17 Ang.

PLAT234\_ALERT\_4\_C Large Hirshfeld Difference C22 --C23 . 0.16 Ang.

PLAT234\_ALERT\_4\_C Large Hirshfeld Difference C26 --C27 . 0.19 Ang.

PLAT234\_ALERT\_4\_C Large Hirshfeld Difference C28 --C29 . 0.20 Ang.

PLAT234\_ALERT\_4\_C Large Hirshfeld Difference C37 --C42 . 0.16 Ang.

PLAT234\_ALERT\_4\_C Large Hirshfeld Difference C44 --C45 . 0.18 Ang.

PLAT234\_ALERT\_4\_C Large Hirshfeld Difference C45 --C46 . 0.21 Ang.

PLAT234\_ALERT\_4\_C Large Hirshfeld Difference C50 --C51 . 0.16 Ang.

PLAT234\_ALERT\_4\_C Large Hirshfeld Difference N3 --C94 . 0.21 Ang.

PLAT234\_ALERT\_4\_C Large Hirshfeld Difference C56 --C57 . 0.18 Ang.

PLAT234\_ALERT\_4\_C Large Hirshfeld Difference C57 --C58 . 0.20 Ang.

PLAT234\_ALERT\_4\_C Large Hirshfeld Difference C61 --C62 . 0.16 Ang.

PLAT234\_ALERT\_4\_C Large Hirshfeld Difference C71 --C91 . 0.16 Ang.

PLAT234\_ALERT\_4\_C Large Hirshfeld Difference C82 --C83 . 0.18 Ang.

PLAT234\_ALERT\_4\_C Large Hirshfeld Difference C92 --C93 . 0.21 Ang.

PLAT234\_ALERT\_4\_C Large Hirshfeld Difference C95 --C96 . 0.18 Ang.

PLAT241\_ALERT\_2\_C High 'MainMol' Ueq as Compared to Neighbors of C8 Check

PLAT241\_ALERT\_2\_C High 'MainMol' Ueq as Compared to Neighbors of C69 Check

PLAT241\_ALERT\_2\_C High 'MainMol' Ueq as Compared to Neighbors of C72 Check

PLAT242\_ALERT\_2\_C Low 'MainMol' Ueq as Compared to Neighbors of C25 Check

PLAT242\_ALERT\_2\_C Low 'MainMol' Ueq as Compared to Neighbors of C68 Check

PLAT244\_ALERT\_4\_C Low 'Solvent' Ueq as Compared to Neighbors of C109 Check

PLAT260\_ALERT\_2\_C Large Average Ueq of Residue Including C11 0.165 Check

PLAT331\_ALERT\_2\_C Small Aver Phenyl C-C Dist C25 --C30 . 1.37 Ang.

PLAT331\_ALERT\_2\_C Small Aver Phenyl C-C Dist C31 --C36 . 1.37 Ang.

PLAT331\_ALERT\_2\_C Small Aver Phenyl C-C Dist C97 --C102 . 1.37 Ang.

PLAT369\_ALERT\_2\_C Long C(sp2)-C(sp2) Bond C70 - C73 . 1.53 Ang.

PLAT411\_ALERT\_2\_C Short Inter H...H Contact H107 ..H107 . 2.12 Ang.

-x,1-y,-z = 2\_565 Check

PLAT906\_ALERT\_3\_C Large K Value in the Analysis of Variance ..... 15.910 Check

PLAT906\_ALERT\_3\_C Large K Value in the Analysis of Variance ..... 6.160 Check

PLAT906\_ALERT\_3\_C Large K Value in the Analysis of Variance ..... 3.367 Check

PLAT906\_ALERT\_3\_C Large K Value in the Analysis of Variance ..... 2.214 Check

PLAT910\_ALERT\_3\_C Missing # of FCF Reflection(s) Below Theta(Min). 10 Note

PLAT911\_ALERT\_3\_C Missing FCF Refl Between Thmin & STh/L= 0.595 237 Report

---

## ● Alert level G

|                   |                                                            |      |              |
|-------------------|------------------------------------------------------------|------|--------------|
| PLAT003_ALERT_2_G | Number of Uiso or Uij Restrained non-H Atoms ...           | 27   | Report       |
| PLAT042_ALERT_1_G | Calc. and Reported MoietyFormula Strings Differ            |      | Please Check |
| PLAT178_ALERT_4_G | The CIF-Embedded .res File Contains SIMU Records           | 2    | Report       |
| PLAT187_ALERT_4_G | The CIF-Embedded .res File Contains RIGU Records           | 3    | Report       |
| PLAT335_ALERT_2_G | Check Large C6 Ring C-C Range C13 -C16                     | 0.15 | Ang.         |
| PLAT335_ALERT_2_G | Check Large C6 Ring C-C Range C67 -C72                     | 0.17 | Ang.         |
| PLAT606_ALERT_4_G | Solvent Accessible VOID(S) in Structure .....              |      | ! Info       |
| PLAT790_ALERT_4_G | Centre of Gravity not Within Unit Cell: Resd. #<br>C H C13 | 3    | Note         |
| PLAT860_ALERT_3_G | Number of Least-Squares Restraints .....                   | 171  | Note         |
| PLAT868_ALERT_4_G | ALERTS Due to the Use of _smtbx_masks Suppressed           |      | ! Info       |
| PLAT883_ALERT_1_G | No Info/Value for _atom_sites_solution_primary .           |      | Please Do !  |
| PLAT933_ALERT_2_G | Number of OMIT Records in Embedded .res File ...           | 17   | Note         |
| PLAT941_ALERT_3_G | Average HKL Measurement Multiplicity .....                 | 2.0  | Low          |
| PLAT961_ALERT_5_G | Dataset Contains no Negative Intensities .....             |      | Please Check |
| PLAT978_ALERT_2_G | Number C-C Bonds with Positive Residual Density.           | 0    | Info         |

- 
- 1 **ALERT level A** = Most likely a serious problem - resolve or explain  
1 **ALERT level B** = A potentially serious problem, consider carefully  
43 **ALERT level C** = Check. Ensure it is not caused by an omission or oversight  
15 **ALERT level G** = General information/check it is not something unexpected
- 2 **ALERT type 1** CIF construction/syntax error, inconsistent or missing data  
19 **ALERT type 2** Indicator that the structure model may be wrong or deficient  
13 **ALERT type 3** Indicator that the structure quality may be low  
25 **ALERT type 4** Improvement, methodology, query or suggestion  
1 **ALERT type 5** Informative message, check
- 

It is advisable to attempt to resolve as many as possible of the alerts in all categories. Often the minor alerts point to easily fixed oversights, errors and omissions in your CIF or refinement strategy, so attention to these fine details can be worthwhile. In order to resolve some of the more serious problems it may be necessary to carry out additional measurements or structure refinements. However, the purpose of your study may justify the reported deviations and the more serious of these should normally be commented upon in the discussion or experimental section of a paper or in the "special\_details" fields of the CIF. checkCIF was carefully designed to identify outliers and unusual parameters, but every test has its limitations and alerts that are not important in a particular case may appear. Conversely, the absence of alerts does not guarantee there are no aspects of the results needing attention. It is up to the individual to critically assess their own results and, if necessary, seek expert advice.

### Publication of your CIF in IUCr journals

A basic structural check has been run on your CIF. These basic checks will be run on all CIFs submitted for publication in IUCr journals (*Acta Crystallographica*, *Journal of Applied Crystallography*, *Journal of Synchrotron Radiation*); however, if you intend to submit to *Acta Crystallographica Section C* or *E* or *IUCrData*, you should make sure that full publication checks are run on the final version of your CIF prior to submission.

### Publication of your CIF in other journals

Please refer to the *Notes for Authors* of the relevant journal for any special instructions relating to CIF submission.

## Validation response form

Please find below a validation response form (VRF) that can be filled in and pasted into your CIF.

```
# start Validation Reply Form
_vrf_RINTA01_aaa
;
PROBLEM: The value of Rint is greater than 0.12
RESPONSE: ...
;
_vrf_PLAT026_aaa
;
PROBLEM: Ratio Observed / Unique Reflections (too) Low ..          28% Check
RESPONSE: ...
;
_vrf_PLAT020_aaa
;
PROBLEM: The Value of Rint is Greater Than 0.12 .....          0.122 Report
RESPONSE: ...
;
_vrf_PLAT084_aaa
;
PROBLEM: High wR2 Value (i.e. > 0.25) .....          0.27 Report
RESPONSE: ...
;
_vrf_PLAT230_aaa
;
PROBLEM: Hirshfeld Test Diff for      N3      --C103      .          5.4 s.u.
RESPONSE: ...
;
_vrf_PLAT234_aaa
;
PROBLEM: Large Hirshfeld Difference N7      --C40      .          0.17 Ang.
RESPONSE: ...
;
_vrf_PLAT241_aaa
;
PROBLEM: High      'MainMol' Ueq as Compared to Neighbors of          C8 Check
RESPONSE: ...
;
_vrf_PLAT242_aaa
;
PROBLEM: Low      'MainMol' Ueq as Compared to Neighbors of          C25 Check
RESPONSE: ...
;
_vrf_PLAT244_aaa
;
PROBLEM: Low      'Solvent' Ueq as Compared to Neighbors of          C109 Check
RESPONSE: ...
;
_vrf_PLAT260_aaa
;
PROBLEM: Large Average Ueq of Residue Including          C11          0.165 Check
RESPONSE: ...
;
_vrf_PLAT331_aaa
;
PROBLEM: Small Aver Phenyl C-C Dist C25      --C30      .          1.37 Ang.
RESPONSE: ...
;
_vrf_PLAT369_aaa
```

```
;
PROBLEM: Long C(sp2)-C(sp2) Bond C70 - C73 . 1.53 Ang.
RESPONSE: ...
;
_vrf_PLAT411_aaa
;
PROBLEM: Short Inter H...H Contact H107 ..H107 . 2.12 Ang.
RESPONSE: ...
;
_vrf_PLAT906_aaa
;
PROBLEM: Large K Value in the Analysis of Variance ..... 15.910 Check
RESPONSE: ...
;
_vrf_PLAT910_aaa
;
PROBLEM: Missing # of FCF Reflection(s) Below Theta(Min). 10 Note
RESPONSE: ...
;
_vrf_PLAT911_aaa
;
PROBLEM: Missing FCF Refl Between Thmin & STh/L= 0.595 237 Report
RESPONSE: ...
;
# end Validation Reply Form
```

---

**PLATON version of 10/08/2020; check.def file version of 06/08/2020**

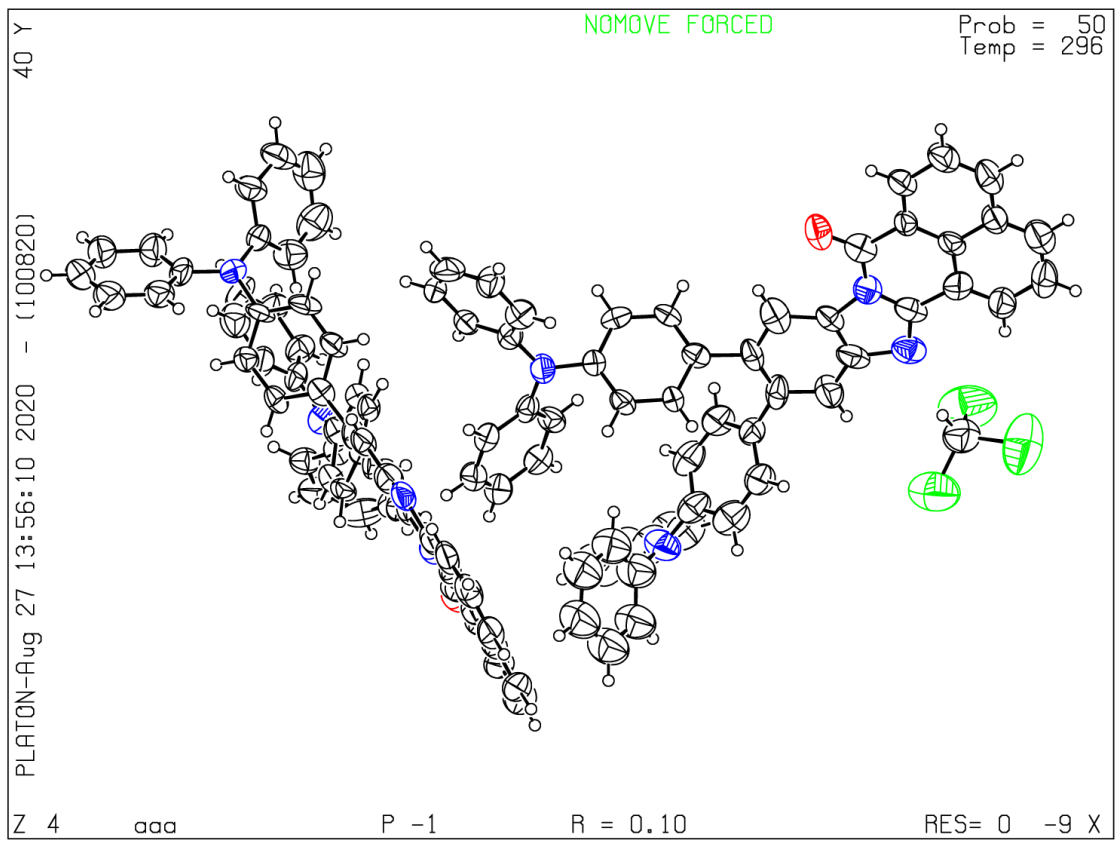

Supplement: mmc2.pdf [file mmc2.pdf]
