# Supplementary material for: A simple molecular design towards the conversion of a MCL backbone to a multifunctional emitter exhibiting polymorphism, AIE, TADF and MCL
Source: PubMed Central journal article supplement — Heliyon. 2022 Oct 25;8(10):e11221. doi: 10.1016/j.heliyon.2022.e11221 (PMC9634020; doi:10.1016/j.heliyon.2022.e11221), 2022-10-25

# checkCIF/PLATON report

Structure factors have been supplied for datablock(s) a

THIS REPORT IS FOR GUIDANCE ONLY. IF USED AS PART OF A REVIEW PROCEDURE FOR PUBLICATION, IT SHOULD NOT REPLACE THE EXPERTISE OF AN EXPERIENCED CRYSTALLOGRAPHIC REFEREE.

No syntax errors found.      CIF dictionary      Interpreting this report

## Datablock: a

---

|                 |                         |                         |              |
|-----------------|-------------------------|-------------------------|--------------|
| Bond precision: | C-C = 0.0053 A          | Wavelength=0.71073      |              |
| Cell:           | a=12.428(9)             | b=14.064(10)            | c=25.185(18) |
|                 | alpha=90                | beta=101.955(9)         | gamma=90     |
| Temperature:    | 296 K                   |                         |              |
|                 | Calculated              | Reported                |              |
| Volume          | 4307(5)                 | 4307(5)                 |              |
| Space group     | P 21/c                  | P 1 21/c 1              |              |
| Hall group      | -P 2ybc                 | -P 2ybc                 |              |
| Moiety formula  | C54 H36 N4 O, 2(C H4 O) | C54 H36 N4 O, 2(C H4 O) |              |
| Sum formula     | C56 H44 N4 O3           | C56 H44 N4 O3           |              |
| Mr              | 820.95                  | 820.95                  |              |
| Dx,g cm-3       | 1.266                   | 1.266                   |              |
| Z               | 4                       | 4                       |              |
| Mu (mm-1)       | 0.079                   | 0.079                   |              |
| F000            | 1728.0                  | 1728.0                  |              |
| F000'           | 1728.68                 |                         |              |
| h,k,lmax        | 15,17,30                | 15,15,30                |              |
| Nref            | 8010                    | 7678                    |              |
| Tmin,Tmax       | 0.986,0.989             | 0.568,0.746             |              |
| Tmin'           | 0.986                   |                         |              |

Correction method= # Reported T Limits: Tmin=0.568 Tmax=0.746  
AbsCorr = MULTI-SCAN

Data completeness= 0.959      Theta(max)= 25.500

R(reflections)= 0.0734( 4430)      wR2(reflections)= 0.2359( 7678)

S = 1.047      Npar= 572

---

The following ALERTS were generated. Each ALERT has the format  
**test-name\_ALERT\_alert-type\_alert-level.**  
Click on the hyperlinks for more details of the test.

---

### ● Alert level C

DIFMX02\_ALERT\_1\_C The maximum difference density is > 0.1\*ZMAX\*0.75  
The relevant atom site should be identified.

|                   |                                                 |                 |         |        |
|-------------------|-------------------------------------------------|-----------------|---------|--------|
| PLAT029_ALERT_3_C | _diffn_measured_fraction_theta_full             | value Low       | 0.960   | Why?   |
| PLAT094_ALERT_2_C | Ratio of Maximum / Minimum Residual Density     | ....            | 2.25    | Report |
| PLAT097_ALERT_2_C | Large Reported Max. (Positive) Residual Density |                 | 0.61    | eA-3   |
| PLAT230_ALERT_2_C | Hirshfeld Test Diff for                         | C1 --C6         | 6.0     | s.u.   |
| PLAT260_ALERT_2_C | Large Average Ueq of Residue Including          | O2              | 0.103   | Check  |
| PLAT260_ALERT_2_C | Large Average Ueq of Residue Including          | O3              | 0.144   | Check  |
| PLAT340_ALERT_3_C | Low Bond Precision on                           | C-C Bonds ..... | 0.00528 | Ang.   |
| PLAT414_ALERT_2_C | Short Intra D-H..H-X                            | H3A ..H56C      | 1.99    | Ang.   |
|                   |                                                 | x,y,z =         | 1_555   | Check  |
| PLAT906_ALERT_3_C | Large K Value in the Analysis of Variance       | .....           | 11.889  | Check  |
| PLAT906_ALERT_3_C | Large K Value in the Analysis of Variance       | .....           | 2.399   | Check  |
| PLAT911_ALERT_3_C | Missing FCF Refl Between Thmin & STh/L=         | 0.600           | 243     | Report |

---

### ● Alert level G

|                   |                                                  |       |      |              |
|-------------------|--------------------------------------------------|-------|------|--------------|
| PLAT003_ALERT_2_G | Number of Uiso or Uij Restrained non-H Atoms     | ...   | 2    | Report       |
| PLAT007_ALERT_5_G | Number of Unrefined Donor-H Atoms                | ..... | 2    | Report       |
| PLAT072_ALERT_2_G | SHELXL First Parameter in WGHT Unusually Large   |       | 0.13 | Report       |
| PLAT178_ALERT_4_G | The CIF-Embedded .res File Contains SIMU Records |       | 1    | Report       |
| PLAT720_ALERT_4_G | Number of Unusual/Non-Standard Labels            | ..... | 1    | Note         |
| PLAT860_ALERT_3_G | Number of Least-Squares Restraints               | ..... | 6    | Note         |
| PLAT883_ALERT_1_G | No Info/Value for _atom_sites_solution_primary   |       |      | Please Do !  |
| PLAT910_ALERT_3_G | Missing # of FCF Reflection(s) Below Theta(Min). |       | 1    | Note         |
| PLAT912_ALERT_4_G | Missing # of FCF Reflections Above STh/L=        | 0.600 | 3    | Note         |
| PLAT933_ALERT_2_G | Number of OMIT Records in Embedded .res File     | ...   | 4    | Note         |
| PLAT941_ALERT_3_G | Average HKL Measurement Multiplicity             | ..... | 3.4  | Low          |
| PLAT951_ALERT_5_G | Calculated (ThMax) and CIF-Reported Kmax Differ  |       | 2    | Units        |
| PLAT957_ALERT_1_G | Calculated (ThMax) and Actual (FCF) Kmax Differ  |       | 2    | Units        |
| PLAT961_ALERT_5_G | Dataset Contains no Negative Intensities         | ..... |      | Please Check |
| PLAT978_ALERT_2_G | Number C-C Bonds with Positive Residual Density. |       | 1    | Info         |

---

0 **ALERT level A** = Most likely a serious problem - resolve or explain  
0 **ALERT level B** = A potentially serious problem, consider carefully  
12 **ALERT level C** = Check. Ensure it is not caused by an omission or oversight  
15 **ALERT level G** = General information/check it is not something unexpected

3 **ALERT type 1** CIF construction/syntax error, inconsistent or missing data  
10 **ALERT type 2** Indicator that the structure model may be wrong or deficient  
8 **ALERT type 3** Indicator that the structure quality may be low  
3 **ALERT type 4** Improvement, methodology, query or suggestion  
3 **ALERT type 5** Informative message, check

---

## Validation response form

Please find below a validation response form (VRF) that can be filled in and pasted into your CIF.

```
# start Validation Reply Form
_vrf_DIFMX02_a
;
PROBLEM: The maximum difference density is > 0.1*ZMAX*0.75
RESPONSE: ...
;
_vrf_PLAT029_a
;
PROBLEM: _diffn_measured_fraction_theta_full value Low .      0.960 Why?
RESPONSE: ...
```

```

;
_vrf_PLAT094_a
;
PROBLEM: Ratio of Maximum / Minimum Residual Density ....      2.25 Report
RESPONSE: ...
;
_vrf_PLAT097_a
;
PROBLEM: Large Reported Max. (Positive) Residual Density      0.61 eA-3
RESPONSE: ...
;
_vrf_PLAT230_a
;
PROBLEM: Hirshfeld Test Diff for      C1      --C6      .      6.0 s.u.
RESPONSE: ...
;
_vrf_PLAT260_a
;
PROBLEM: Large Average Ueq of Residue Including      O2      0.103 Check
RESPONSE: ...
;
_vrf_PLAT340_a
;
PROBLEM: Low Bond Precision on      C-C Bonds .....      0.00528 Ang.
RESPONSE: ...
;
_vrf_PLAT414_a
;
PROBLEM: Short Intra D-H..H-X      H3A      ..H56C      1.99 Ang.
RESPONSE: ...
;
_vrf_PLAT906_a
;
PROBLEM: Large K Value in the Analysis of Variance .....      11.889 Check
RESPONSE: ...
;
_vrf_PLAT911_a
;
PROBLEM: Missing FCF Refl Between Thmin & STh/L=      0.600      243 Report
RESPONSE: ...
;
# end Validation Reply Form

```

---

It is advisable to attempt to resolve as many as possible of the alerts in all categories. Often the minor alerts point to easily fixed oversights, errors and omissions in your CIF or refinement strategy, so attention to these fine details can be worthwhile. In order to resolve some of the more serious problems it may be necessary to carry out additional measurements or structure refinements. However, the purpose of your study may justify the reported deviations and the more serious of these should normally be commented upon in the discussion or experimental section of a paper or in the "special\_details" fields of the CIF. checkCIF was carefully designed to identify outliers and unusual parameters, but every test has its limitations and alerts that are not important in a particular case may appear. Conversely, the absence of alerts does not guarantee there are no aspects of the results needing attention. It is up to the individual to critically assess their own results and, if necessary, seek expert advice.

### **Publication of your CIF in IUCr journals**

A basic structural check has been run on your CIF. These basic checks will be run on all CIFs submitted for publication in IUCr journals (*Acta Crystallographica*, *Journal of Applied Crystallography*, *Journal of Synchrotron Radiation*); however, if you intend to submit to *Acta Crystallographica Section C* or *E* or *IUCrData*, you should make sure that full publication checks are run on the final version of your CIF prior to submission.

### **Publication of your CIF in other journals**

Please refer to the *Notes for Authors* of the relevant journal for any special instructions relating to CIF submission.

---

**PLATON version of 10/08/2020; check.def file version of 06/08/2020**

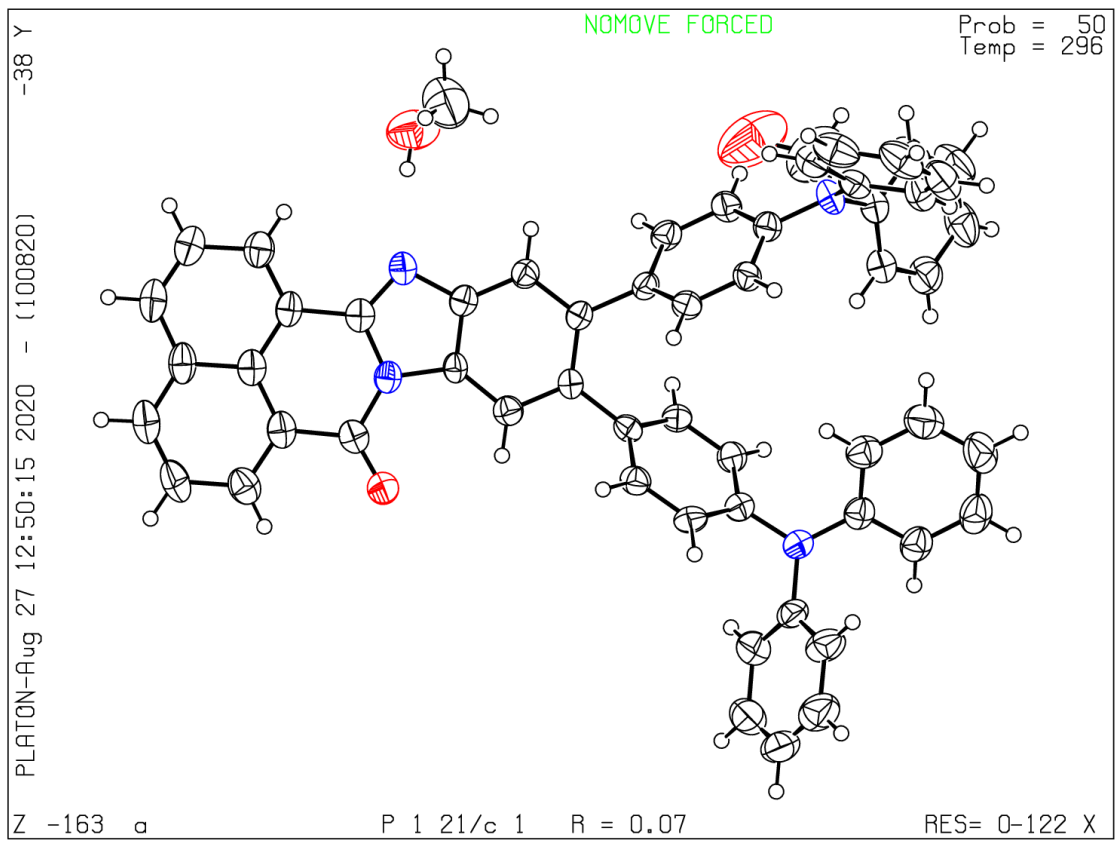

Supplement: mmc4.pdf [file mmc4.pdf]
